# Supplementary material for: A Bioluminescent Biosensor for Quantifying the Interaction of SARS-CoV-2 and Its Receptor ACE2 in Cells and In Vitro
Source: MDPI journal article supplement (doi:10.3390/v13061055), 2021-06-02
Supplement: s1 [file s1]

**An Ultrasensitive Biosensor for Quantifying the Interaction of SARS-CoV-2 and Its Receptor ACE2 in Cells and *in vitro***

Xiaolong Yang, Lidong Liu, Yawei Hao, Eva So, Sahar Sarmasti Emami, Derek Zhang, Yanping Gong, Prameet Sheth, Yu Tian Wang

This supporting information includes 2 tables for sequences of primers used for biosensor constructions and mutagenesis.

**Table 1S. Primers used for construction of RBD:ACE2 NanoBiT biosensor**

| No | Name                                | Primer sequence                                                                                                                                       |
|----|-------------------------------------|-------------------------------------------------------------------------------------------------------------------------------------------------------|
| 1  | EcoRV-SmBiT-GS-F                    | 5'-CCG <b>GATATC</b> AGTGACCGGCTACCGGCTGTTCGAGGA<br>GATTCTCGGGAGTTCCGGTGGTGGCGGGAGCGGAGGT<br>GGAGGCTCGAG CGGT-3'                                      |
| 2  | GS-ACE2-18F                         | GGGAGTTCCGGTGGTGGCGGGAGCGGAGGTGGAGGCT<br>CGAGCGGTCAGTCCACCATTGAGGAACAG                                                                                |
| 3  | NcoI-STOP-6HisG-<br>ACE2-615R       | 5'-CATGCCATGG <b>TTA</b> ATGGTGATGGTGATGATGTCC<br>GTCTGCATATGGACTCCAGT-3'                                                                             |
| 4  | EcoRV-ACE2-18F                      | 5'-CCG <b>GATATC</b> ACAGTCCACCATTGAGGAACAG-3'                                                                                                        |
| 5  | GS-ACE2-615R                        | 5'-ACCGCTCGAGCCTCCACCTCCGCTCCCGCCACCACC<br>GGAAC <b>TCCC</b> GTCTGCATATGGACTCCAGT-3'                                                                  |
| 6  | NcoI-STOP-6HisG-<br>SmBiT-GS-R      | 5'-CATGCCATGG <b>TTA</b> ATGGTGATGGTGATGATGTCCGA<br>GAATCTCCTCGAACAGCCGGTAGCCGGTCACACCGCTC<br>GAGCCTCCACCTCCGCTCCCGCCACCACC <b>CGGA</b> ACTCCC<br>-3' |
| 7  | EcoRV-LgBiT-F                       | 5'-CCG <b>G ATA TCA</b> GTCTTCACACTCGAAGATTTC-3'                                                                                                      |
| 8  | GS-LgBiT-R                          | 5'-ACCGCTCGAGCCTCCACCTCCGCTCCCGCCACCACC<br>GGAAC <b>TCCC</b> ACTGTTGATGGTTACTCGGAACAG-3'                                                              |
| 9  | GS-RBD319-F                         | 5'- GGGAGTTCCGGTGGTGGCGGGAGCGGAGGTGGAG<br>GCTCGAGCGGTAGGGTCCAACCAACAGAGAGC-3'                                                                         |
| 10 | NcoI-STOP-6HisG-<br>RBD-541R        | 5'-CATGCCATGG <b>TTA</b> ATGGTGATGGTGATGATGTCCGA<br>AGTTCACACACTTGTTCCTTC-3'                                                                          |
| 11 | EcoRV-RBD319-F                      | 5'- CCG <b>G ATA TCA</b> AGGGTCCAACCAACAGAGAGC-3'                                                                                                     |
| 12 | GS-RBD-685R                         | 5'- ACCGCTCGAGCCTCCACCTCCGCTCCCGCCACCA<br>CCGGAAC <b>TCCCC</b> CTTGCCCTCCTTGGGCTG-3'                                                                  |
| 13 | NcoI-STOP-6HisG-<br>LgBiT-R         | 5'-CATGCCATGG <b>TTA</b> ATGGTGATGGTGATGATGTCC<br>ACTGTTGATGGTTACTCGGAACAG-3'                                                                         |
| 14 | NcoI-STOP-6HisG-<br>ACE2-515R       | 5'-CATGCCATGG <b>TTA</b> ATGGTGATGGTGATGATGTCCAT<br>ATCGAATGAATGAGTAATC-3'                                                                            |
| 15 | NcoI-STOP-6HisG-<br>RBD-685R-NoStop | CATGCCATGG <b>TTA</b> ATGGTGATGGTGATGATGTCCCCTT<br>GCCCTCCTTGGGCTGTTG                                                                                 |
| 16 | GS-LgBiT-F                          | 5'-GGCTCGAGCGGTGGTGGCGGGAGCGGAGGTGGAGG<br>GTCGTCAGGTGTCTTCACACTCGAAGATTTC                                                                             |

**Table S2. Primers used for deletions and mutagenesis**

| No | Name                      | Primer Sequence                                                              |
|----|---------------------------|------------------------------------------------------------------------------|
| 1  | NcoI-STOP-6HisG-RBD-541R  | 5'- CATGCCATGGTTAATGGTGATGGTGATGATGTCCGAAGTTCACACACTTGTTCTTC-3'              |
| 2  | GS-RBD541-R               | 5'- ACCGCTCGAGCCTCCACCTCCGCTCCCGCCACCACC GGA ACTCCCGAAGTTCACACACTTGTTCTTC-3' |
| 3  | NcoI-STOP-6HisG-ACE2-515R | 5'- CATGCCATGGTTAATGGTGATGGTGATGATGTCCATATCGAATGAATGAGTAATC-3'               |
| 4  | NcoI-STOP-6HisG-ACE2-415R | 5'-CATGCCATGGTTAATGGTGATGGTGATGATGTCCAGGTGTGGCTGCAGAAAGTGAC-3'               |
| 5  | ACE2-K31A-S               | 5'- CAAGACATTTTTGGACGCGTTTAACCACGAAGCC-3'                                    |
| 6  | ACE2-K31A-AS              | 5'- GGCTTCGTGGTTAAACGCGTCCAAAAATGTCTTG-3'                                    |
| 7  | ACE2-E35A-S               | 5'-GACAAGTTTAACCACG CAGCCGAAGACCTGTTC-3'                                     |
| 8  | ACE2-E35A-AS              | 5'- GAACAGGTCTTCGGCTGCGTGGTTAACTTGTC-3'                                      |
| 9  | ACE2-M82A-S               | 5'-GTCCACACTTGCCCAAGCGTATCCACTACAAGAAATTC-3'                                 |
| 10 | ACE2-M82A-AS              | 5'-GAATTTCTTG TAGTGGATACGCTTGGGCAAGTGTGGAC-3'                                |
| 11 | ACE2-K353A-S              | 5'-GCTTGGGACCTGGGGGCGGGCGACTTCAGGATCC-3'                                     |
| 12 | ACE2-K353A-AS             | 5'-GGATCCTGAAGTCGCCCCGCCCCAGGTCCCAAGC-3'                                     |
| 13 | RBD-V367F-S               | 5'-GTGTGGCTGACTACTCTTTCCTCTACAACTCTGCCTC-3'                                  |
| 14 | RBD-V367F-AS              | 5'- GAGGCAGAGTTGTAGAGGAAGAGTAGTCAGCCACAC-3'                                  |
| 15 | RBD-L452R-S               | 5'- GGCAACTACAAC TACCGCTACAGACTGTT CAG-3'                                    |
| 16 | RBD-L452R-AS              | 5'- CTGAACAGTCTGTAGCGGTAGTTGTAGTTGCC-3'                                      |
| 17 | RBD-L455A-S               | 5'-CAACTACCTCTACAGAGCGTTCAGGAAGAGCAAC-3'                                     |
| 18 | RBD-L455A-AS              | 5'-GTTGCTCTTCCTGAACGCTCTGTAGAGGTAGTTG-3'                                     |
| 19 | RBD-A475V-S               | 5'- CAGAGATTTACCAGGTTGGCAGCACACCATG-3'                                       |
| 20 | RBD-A475V-AS              | 5'-CATGGTGTGCTGCCAACCTGGTAAATCTCTG-3'                                        |

|    |              |                                            |
|----|--------------|--------------------------------------------|
| 21 | RBD-G476S-S  | 5'-GAGATTTACCAGGCTAGCAGCACACCATGTAATG-3'   |
| 22 | RBD-G476S-AS | 5'-CATTACATGGTGTGCTGCTAGCCTGGTAAATCTC-3'   |
| 23 | RBD-F490L-S  | 5'-GGGCTTCAACTGTTACCTTCCACTCCAATCCTAT-3'   |
| 24 | RBD-F490L-AS | 5'-ATAGGATTGGAGTGGAAAGTAACAGTTGAAGCCC-3'   |
| 25 | RBD-Q493A-S  | 5'-CTGTTACTTTCCACTCGCATCCTATGGCTTCCAACC-3' |
| 26 | RBD-Q493A-AS | 5'-GGTTGGAAGCCATAGGATGCGAGTGGAAAGTAACAG-3' |
| 27 | RBD-T572I-S  | 5'-GGGACATTGCTGACATTCACAGATGCTGTGAG-3'     |
| 28 | RBD-T572I-AS | 5'-CTCACAGCATCTGTGATGTCAGCAATGTCCC-3'      |
